# Supplementary material for: Molecular and functional characterization of a novel chromoplast-specific lycopene β-cyclase from Citrus and its relation to lycopene accumulation
Source: PubMed Central journal article supplement — J Exp Bot. 2009 Mar 26;60(6):1783–97. doi: 10.1093/jxb/erp048 (PMC2671624; doi:10.1093/jxb/erp048), 2009-03-26
Supplement: erp048_1.pdf [file erp048_1.pdf]

**Molecular and functional characterization of a novel chromoplast-specific lycopene  $\beta$ -cyclase from *Citrus* and its relation to lycopene accumulation**

**Berta Alquézar, Lorenzo Zacarías and María J. Rodrigo\***

**Supplementary material**

**Table S1.** Identification of  $\beta$ -LCY2a and  $\beta$ -LCY2b alleles in *Citrus* cDNA libraries.

| Library Name | Description of the library                                       | Database       | <i>Citrus</i> sp.    | Number of ESTs |               |
|--------------|------------------------------------------------------------------|----------------|----------------------|----------------|---------------|
|              |                                                                  |                |                      | $\beta$ -LCY2a | $\beta$ -LCYb |
| Flavedo 5    | Temperature-conditioned flavedo                                  | HarvEST:Citrus | <i>C. paradisi</i>   | 0              | 1             |
| Flavedo 6    | Hot water-treated flavedo                                        | HarvEST:Citrus | <i>C. paradisi</i>   | 0              | 1             |
| UCDCS01      | Flavedo from mature fruits                                       | HarvEST:Citrus | <i>C. sinensis</i>   | 1              | 0             |
| UCRCR01      | Albedo from breaking fruits                                      | HarvEST:Citrus | <i>C. reticulata</i> | 1              | 0             |
| UCRCS01      | Flavedo and albedo from cold-acclimated fruits                   | HarvEST:Citrus | <i>C. sinensis</i>   | 0              | 2             |
| UCRCS04      | Flower buds at different developmental stages                    | HarvEST:Citrus | <i>C. sinensis</i>   | 2              | 0             |
| UCRCS05      | Pulp from mature fruits stored at cold temperatures              | HarvEST:Citrus | <i>C. sinensis</i>   | 0              | 1             |
| UCRCS11      | Flavedo and albedo from fruits at different developmental stages | HarvEST:Citrus | <i>C. sinensis</i>   | 3              | 1             |
| FlavFr1      | Flavedo from mature fruits stored at cold temperatures           | CFGP           | <i>C. clementina</i> | 2              | 0             |
| OF1          | Senescent ovaries and GA <sub>3</sub> -treated fruitlets         | CFGP           | <i>C. clementina</i> | 1              | 0             |
| PostHarvP1   | Flavedo from mature fruits infected with <i>Penicillium</i>      | CFGP           | <i>C. clementina</i> | 2              | 0             |
| TF           | Flavedo and pulp from mature fruits                              | CFGP           | <i>C. clementina</i> | 0              | 2             |
